# Supplementary material for: Positive aging in InP-based QD-LEDs encapsulated with epoxy: the role of thiol molecules and post-annealing treatment
Source: Royal Society of Chemistry journal article supplement (doi:10.1039/d3tc02098c), 2023-01-01
Supplement: d3tc02098c1.pdf [file d3tc02098c1.pdf]

## Supplementary Information

### **Positive Aging in InP-based QD-LEDs Encapsulated with Epoxy: Role of Thiol Molecules and Post-Annealing Treatment**

Hyunwoo Jang<sup>a</sup>, Seungki Shin<sup>a</sup>, Minwoo Lee<sup>a</sup>, Namyong Gwak<sup>a</sup>, Seongchan Kim<sup>a</sup>, Yunseo Lee<sup>a</sup> and Nuri Oh<sup>a,\*</sup>

<sup>a</sup>Division of Materials Science and Engineering, Hanyang University, 222, Wangsimni-ro, Seongdong-gu, Seoul, 04763, Republic of Korea.

## Experimental

### Materials

A Poly(3,4-ethylenedioxythiophene) polystyrene sulfonate (PEDOT:PSS AI4083) was purchased from Heraeus. Poly[(9,9-dioctylfluorenyl-2,7-diyl)-co-(4,4'-(N-(p-butylphenyl)) diphenylamine)] (TFB) was purchased from American Dye Source, Inc. Zinc acetate dihydrate ( $\text{Zn}(\text{Ac})_2 \cdot 2\text{H}_2\text{O}$ ) (ACS reagent,  $\geq 98\%$ ), magnesium acetate tetrahydrate ( $\text{Mg}(\text{Ac})_2 \cdot 4\text{H}_2\text{O}$ ) (ACS reagent,  $\geq 99\%$ ), tetramethylammonium hydroxide pentahydrate (TMAH $\cdot 5\text{H}_2\text{O}$ ) ( $\geq 97\%$ ), pentaerythritol tetrakis(3-mercaptopropionate) (PETMP), pentaerythritol tetraacrylate (PETA), molybdenum(VI) oxide (ACS reagent,  $\geq 99.5\%$ ), aluminum (evaporation slug, 99.999%), chlorobenzene (anhydrous,  $\geq 99\%$ ), octane (anhydrous,  $\geq 99\%$ ), dimethyl sulfoxide (DMSO) (ACS reagent,  $\geq 99.9\%$ ) were purchased from Sigma-Aldrich. Ethyl alcohol (anhydrous,  $\geq 99\%$ ) was purchased from DAEJUNG. Norland Optical Adhesive 68 (NOA68) was purchased from Norland Products.

### Fabrication of QD-LEDs

The QD-LEDs were fabricated on glass substrates covered with indium tin oxide (ITO) with a sheet resistance of 10  $\Omega$  per square. The substrates were cleaned by ultrasonication in acetone and isopropanol for 30 min each. Prior to deposition, the substrates were underwent UV-ozone for 15 min. PEDOT:PSS solution (filtered through a 0.45  $\mu\text{m}$  PVDF filter) was spin-coated on top of the substrates using a multistep of 500 rpm for 3 s and 5000 rpm for 30 s and then baked at 120  $^\circ\text{C}$  for 5 min under atmospheric conditions. The PEDOT:PSS-coated substrates were then moved into an  $\text{N}_2$ -filled glovebox and baked at 210  $^\circ\text{C}$  for 15 min. Next, 8 mg/ml of TFB dispersed in chlorobenzene (filtered through a 0.45  $\mu\text{m}$  PTFE filter) was spin-coated at 3000 rpm and baked at 180  $^\circ\text{C}$  for 30 min. Subsequently, QDs dispersed in octane at a concentration of 30 mg/ml were spin-coated at 2000 rpm for 30 s on top of the TFB film and baked at 100  $^\circ\text{C}$  for 30 min.  $\text{Zn}_{0.85}\text{Mg}_{0.15}\text{O}$  NPs, dispersed in ethanol at a concentration of 60 mg/ml, were spin-coated at 3000 rpm for 30 s and baked at 100  $^\circ\text{C}$  for 30 min. Finally, an Al electrode was deposited through thermal evaporation with a shadow mask at a deposition rate of 1–1.3  $\text{\AA}/\text{s}$  under a high vacuum pressure ( $1\text{--}2 \times 10^{-6}$  Torr). After device fabrication, the devices were encapsulated using UV-curable epoxy resin. The epoxy-encapsulated QD-LEDs were annealed at 25  $^\circ\text{C}$ , 80  $^\circ\text{C}$ , and 100  $^\circ\text{C}$ .

### Fabrication of single carrier devices

A hole-only device (HOD) was fabricated with a structure of ITO/PEDOT:PSS/TFB/QD/ $\text{MoO}_x$ /Al/epoxy. The layers from ITO to QD were then fabricated using the same method as the QD-LEDs.  $\text{MoO}_x$  as the electron blocking layer and Al as the electrode were deposited through thermal evaporation with a shadow mask at deposition rates of 0.4–0.6 and 1–1.3  $\text{\AA}/\text{s}$ , respectively. An electron-only-device (EOD) was fabricated with a structure of ITO/ $\text{ZnMgO}$ /QD/ $\text{ZnMgO}$ /Al/epoxy. Each layer was fabricated using the same fabrication method as that of QD-LEDs.

### Synthesis of $\text{Zn}_{0.85}\text{Mg}_{0.15}\text{O}$ NPs

$\text{Zn}_{0.85}\text{Mg}_{0.15}\text{O}$  NPs were synthesized using a solution-precipitation method<sup>1</sup>. Zinc acetate dihydrate (2.55 mmol) and magnesium acetate tetrahydrate (0.45 mmol) dissolved in DMSO (30 ml) were prepared in a three-neck flask and vigorously stirred for 30 min. TMAH (5 mmol) dissolved in ethanol (10 ml) was then added dropwise to the flask for 20 min, and the mixture was stirred for 1 h. Next, the  $\text{Zn}_{0.85}\text{Mg}_{0.15}\text{O}$  NPs were washed twice with acetone and redispersed in ethanol for use.

### Characterization

The current–voltage (I–V) curves of the QD-LEDs were measured using a Keithley 2602A system source meter. The luminance and EL spectra of the QD-LEDs were measured using a PR-670 spectrometer. The PL spectra were measured using a HORIBA Fluoromax-Plus, and the TRPL spectra were measured using a time-correlated single-photon counting (TCSPC) module with an excitation wavelength of 375 nm. XPS analysis was performed using a ThermoFisher Scientific NEXSA. In order to investigate the chemical changes of the  $\text{ZnMgO}$  layer before and after epoxy encapsulation through XPS, we coated QDs and  $\text{ZnMgO}$  on a silicon wafer and selectively applied epoxy to a portion of the surface. The samples were manufactured and stored within a nitrogen-filled glove box, and during XPS measurements, analysis was conducted at the boundary where the epoxy-coated layer was present. The capacitance–voltage characteristics were measured at a frequency of 10 kHz and an amplitude of 300 mV using an S3000 Electrical Parameter Analyzer. The EQE was calculated from the current density, luminance, and EL spectra of the QD-LEDs, which were assumed to be Lambertian emission.

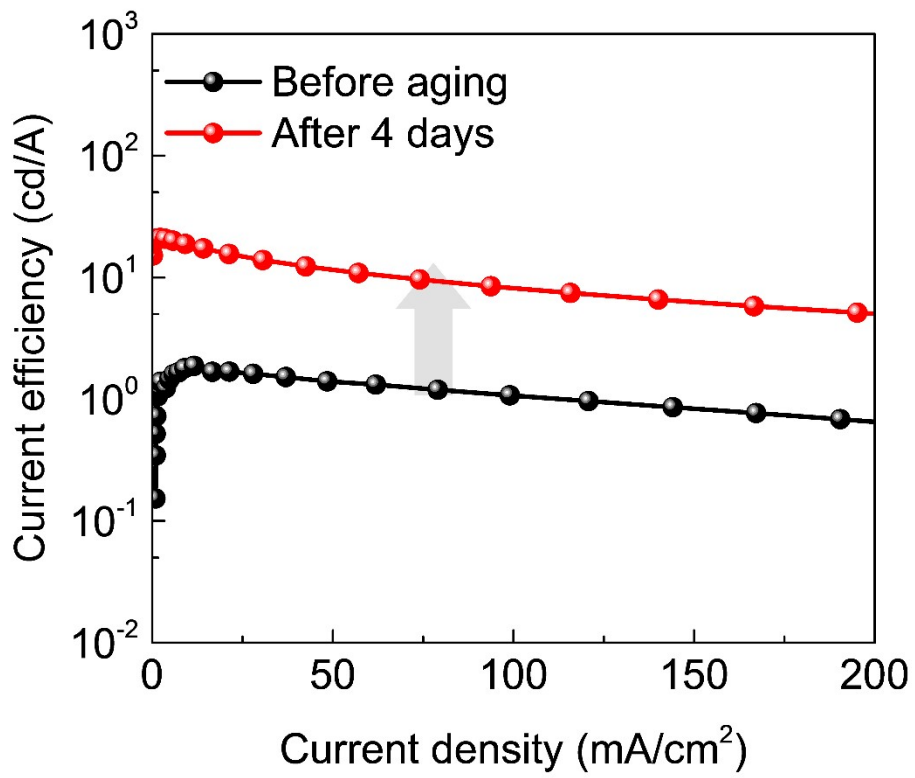

Fig. S1. Current efficiency-current density characteristics of QD-LEDs before and after aging.

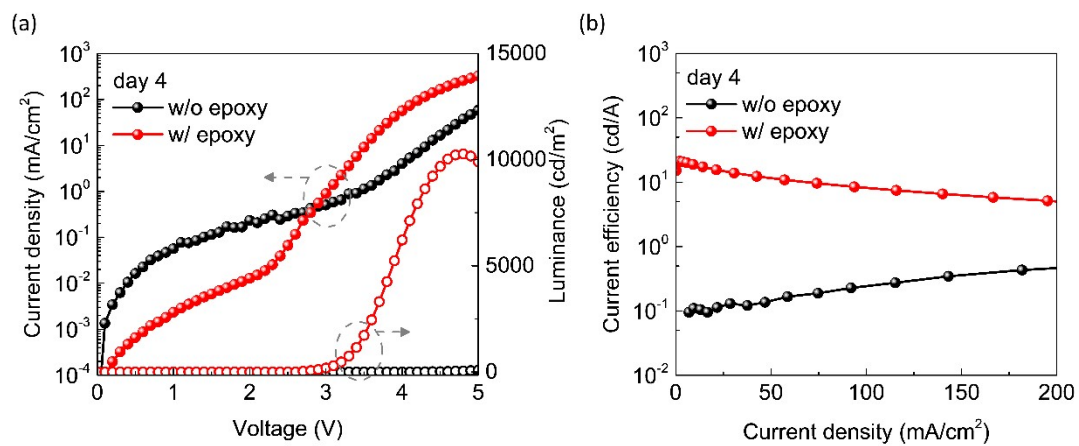

**Fig. S2.** (a) Current density-voltage-luminance and (b) Current efficiency-current density characteristics of QD-LEDs without and with epoxy after 4 days stored in glove box.

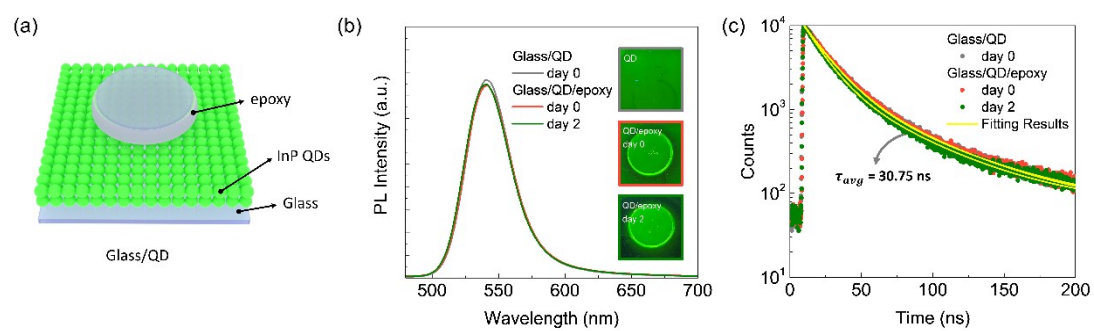

**Fig. S3.** (a) Schematics of Glass/QD structure. (b) PL intensity and (c) TRPL decay profiles at different aging times.

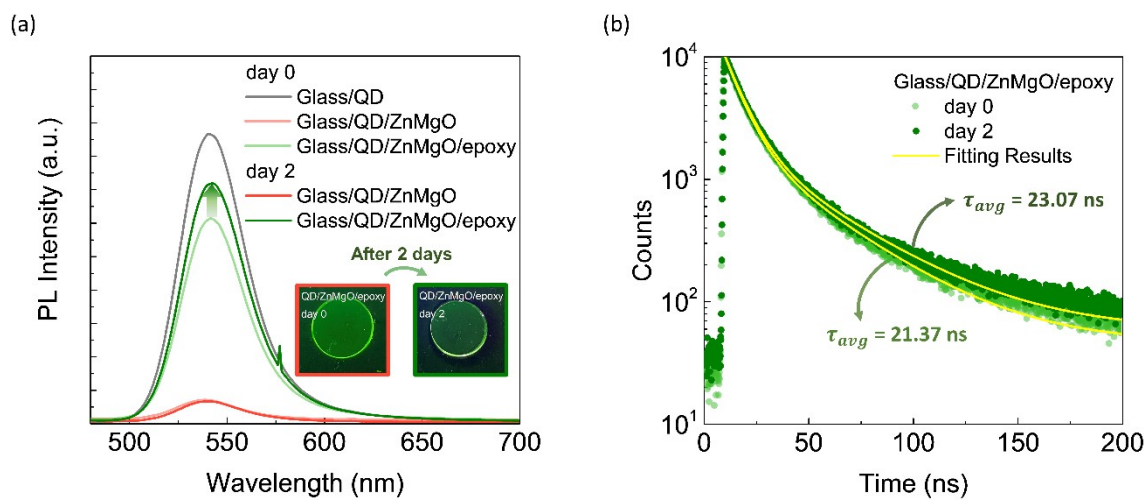

**Fig. S4.** (a) PL intensity and (b) TRPL decay profiles of Glass/QD/ZnMgO/without or with epoxy at different aging time.

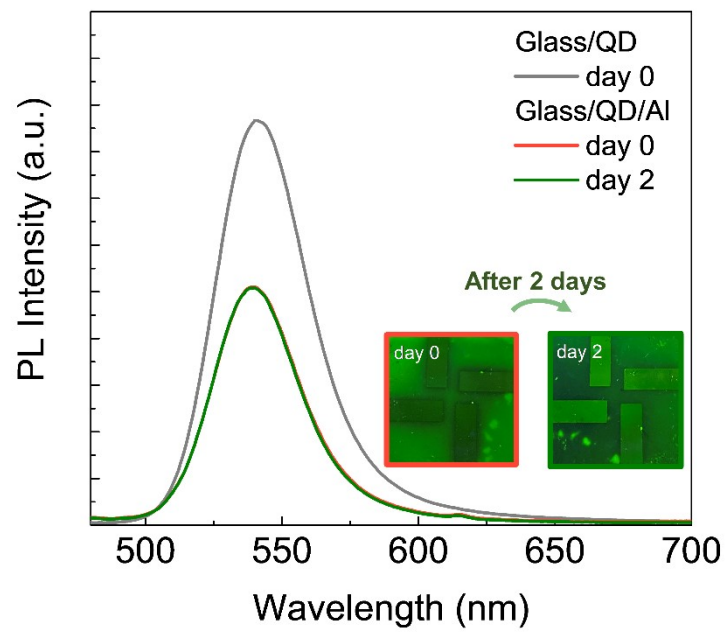

Fig. S5. PL intensity of Glass/QD/Al at different aging time.

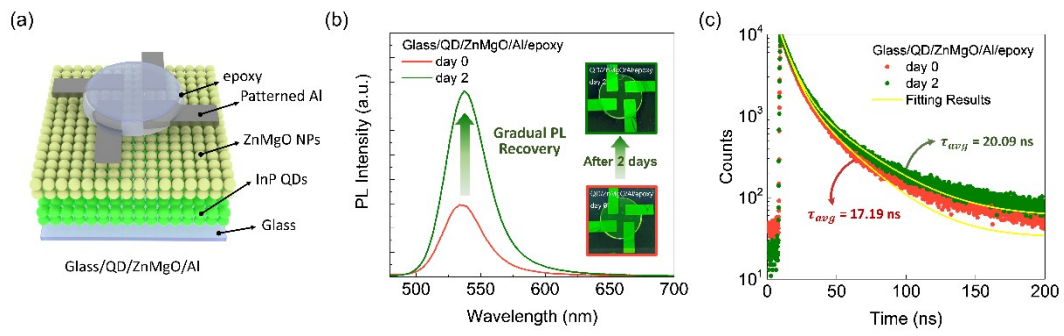

**Fig. S6.** (a) Glass/QD/ZnMgO/Al/epoxy structure. (b) PL intensity and (c) TRPL decay profiles at different aging time.



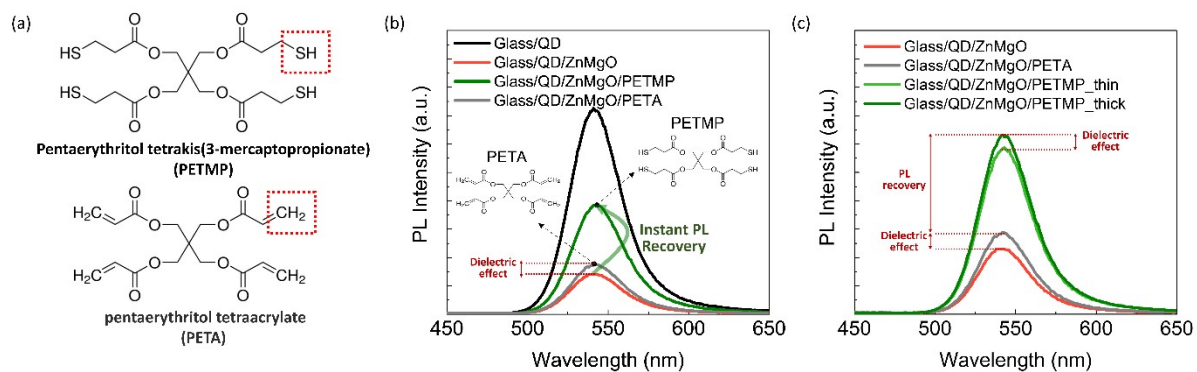

**Fig. S7.** (a) Structures of PETMP and PETA. (b) PL intensity of Glass/QD/ZnMgO/PETMP and PETA. (c) PL intensity of Glass/QD/ZnMgO/thin and thick PETMP.

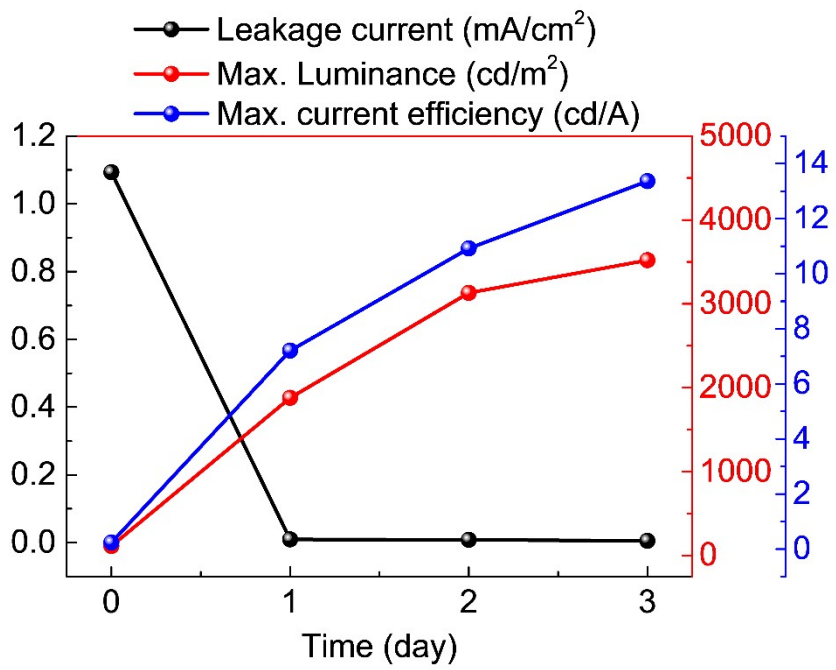

**Fig. S8.** Comparison of leakage current (at 1.0V), maximum luminance and maximum current efficiency of QD-LED at the different aging time.

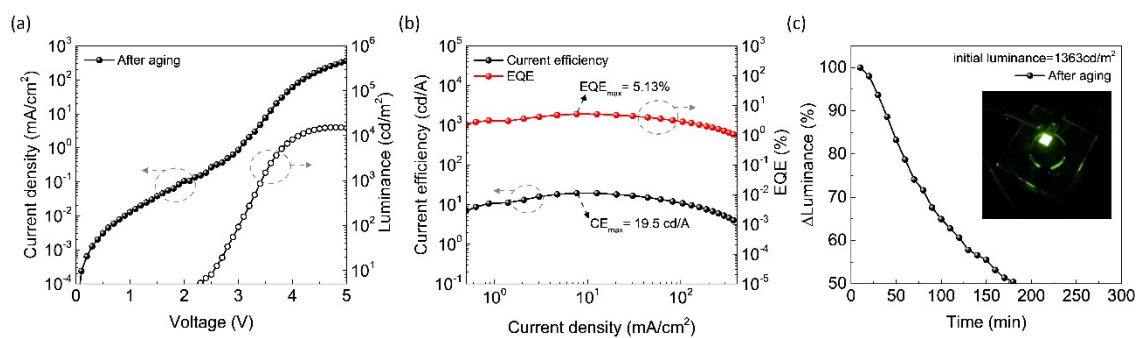

**Fig. S9.** (a) Current density-voltage-luminance, (b) current efficiency-current density-EQE and (c) operational lifetime characteristics of QD-LEDs after undergoing the optimal aging process.

|       | $L_{max}$ [cd/m <sup>2</sup> ] | $CE_{max}$ [cd/A] | $PE_{max}$ [lm/W] | $EQE_{max}$ [%] |
|-------|--------------------------------|-------------------|-------------------|-----------------|
| day 0 | 114.2                          | 0.236             | 0.165             | 0.06            |
| day 1 | 1880                           | 7.205             | 7.592             | 1.87            |
| day 2 | 3131                           | 11.106            | 11.247            | 3.33            |
| day 3 | 3520                           | 13.363            | 13.171            | 3.41            |

**Table S1.** EL performance of the QD-LED as the aging time increases day by day.

## References

- 1 M. Chrzanowski, G. Zatoryb, P. Sitarek, A. Podhorodecki, *ACS Appl. Mater. Interfaces*, 2021, **13**, 20305–20312.
